# Supplementary material for: Establishment of transport channels with carriers for water in reverse osmosis membrane by incorporating hydrotalcite into the polyamide layer
Source: Royal Society of Chemistry journal article supplement (doi:10.1039/c7ra13562a), 2018-01-01
Supplement: c7ra13562a1.pdf [file c7ra13562a1.pdf]

## Supporting Information

### **Establishment of transport channels with carriers for water in reverse osmosis membrane by incorporating hydrotalcite into the polyamide layer**

Xinxia Tian, Jian Wang, Huifeng Zhang, Zhen Cao, Man Zhao, Yipeng Guan, Yushan Zhang\*

Institute of Seawater Desalination and Multipurpose Utilization, State Oceanic Administration, Tianjin  
300192, China.

\*Corresponding author, E-mail: yszhang\_membr@163.com; Tel: +86-02287898130

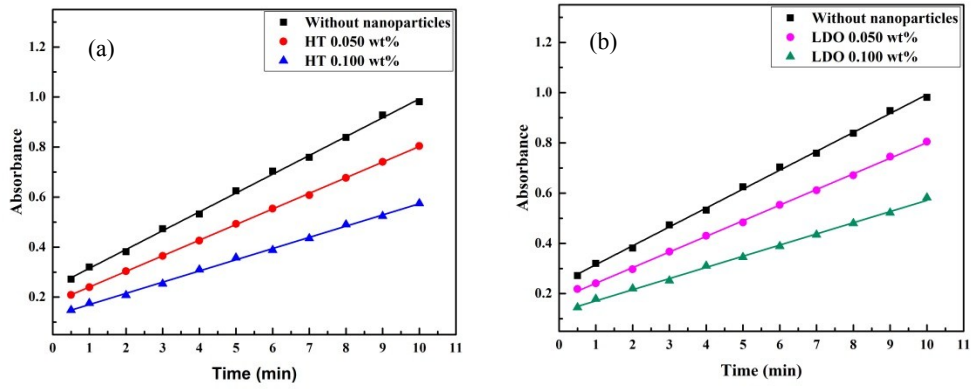

Fig. S1. Effect of nanoparticles concentration on the diffusion of MPD to hexane: (a) HT; (b) LDO

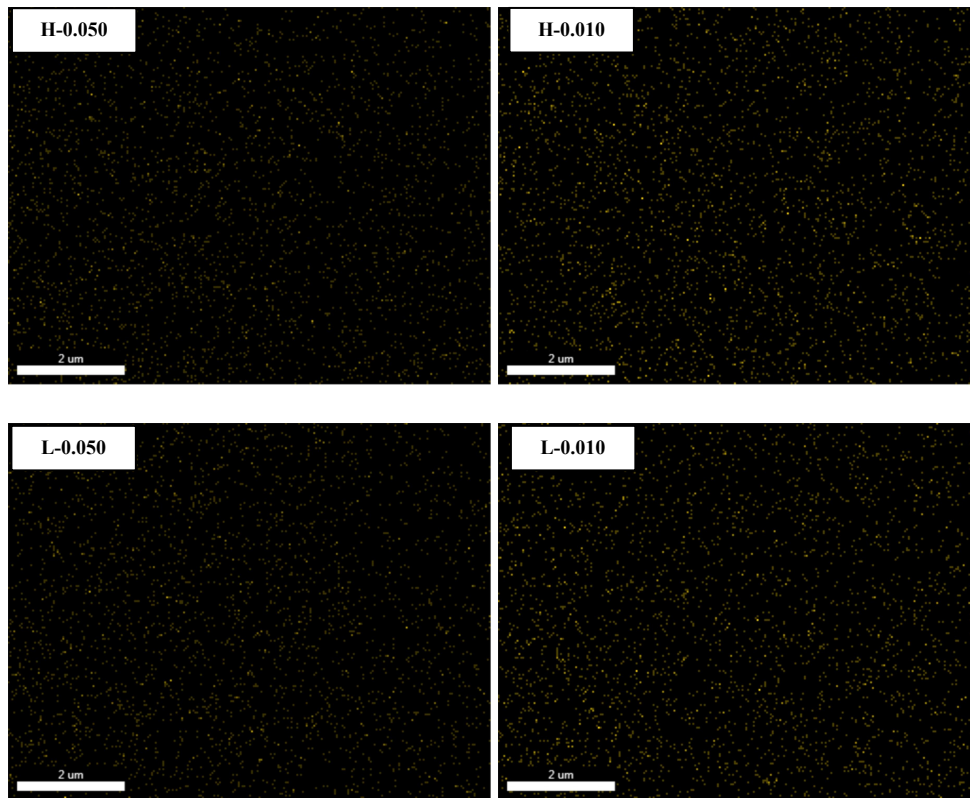

Fig. S2. EDS mapping images depict the distribution of the Al in the RO membranes
